# Supplementary material for: Current Developments in Corneal Topography and Tomography
Source: MDPI journal article supplement (doi:10.3390/diagnostics11081466), 2021-08-13
Supplement: s1 [file s1]

## **Supplement 1. Search strategy**

Literature searches of the PubMed and Web of Science databases were conducted on June 28, 2021; the search strategies are as follows. Specific limited update searches were conducted after June 28, 2021. Reference lists of the included studies were also considered as a source of publications.

### **A.1. PubMed Search (Publication Date 1/10/11–06/28/2021)**

((cornea[Title]) OR (corneal[Title])) AND ((imaging[Title]) OR (tomography[Title]) OR (topography[Title]) OR (Scheimpflug[Title]) OR (Pentacam[Title]) OR (“optical coherence tomography”[Title]) OR (OCT[Title]))  
1907 references.

### **A.2. Web Of Science Search (Publication Date 1/10/11–06/28/2021)**

(TI=("cornea") OR TI=("corneal")) AND (TI=("imaging") OR TI=("tomography") OR TI=("Scheimpflug") OR TI=("Pentacam") OR TI=("optical coherence tomography") OR TI=("OCT"))

Indexes=SCI-EXPANDED, SSCI, A&HCI, CPCI-S, CPCI-SSH, BKCI-S, BKCI-SSH, ESCI, CCR-EXPANDED, IC  
Timespan=All years  
1386 references.

### **A.3. PubMed Search (Publication Date 1/10/11–06/28/2021)**

Search: pentacam and topography Sort by: Most Recent

pentacam: "pentacam"[All Fields] AND "pentacam's"[All Fields]

topography: "topographies"[All Fields] AND "topography"[All Fields]

675 references

### **A.4. Web Of Science Search (Publication Date 1/10/11–06/28/2021)**

(AB=(pentacam)) AND AB=(topography)

Indexes=SCI-EXPANDED, SSCI, A&HCI, CPCI-S, CPCI-SSH, BKCI-S, BKCI-SSH, ESCI, CCR-EXPANDED, IC  
Timespan=All years  
255 references.
